# Supplementary material for: Site-specific programming of the host epithelial transcriptome by the gut microbiota
Source: PubMed Central journal article supplement (PMC4404278; doi:10.1186/s13059-015-0614-4), 2015-03-28
Supplement: 13059_2015_614_MOESM3_ESM.pdf [file 13059_2015_614_MOESM3_ESM.pdf]

### Ileum

### Colon

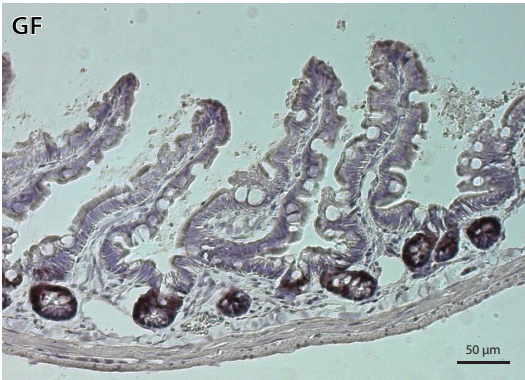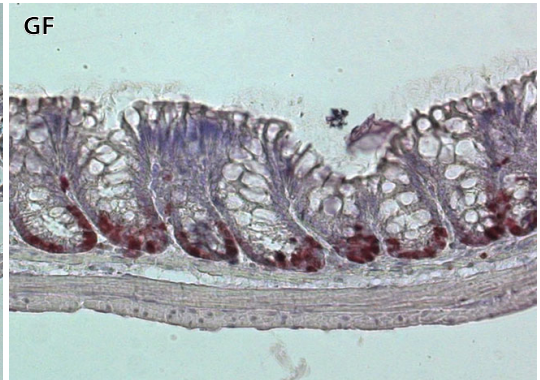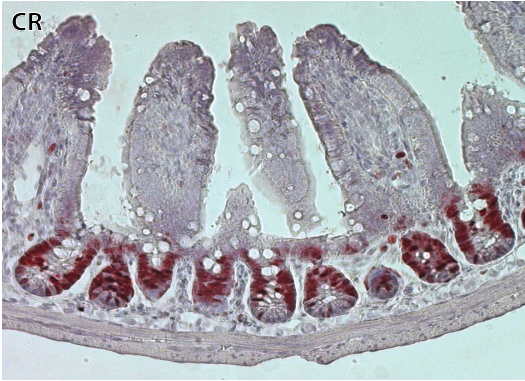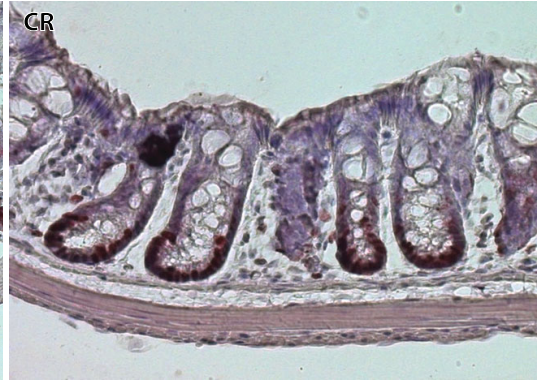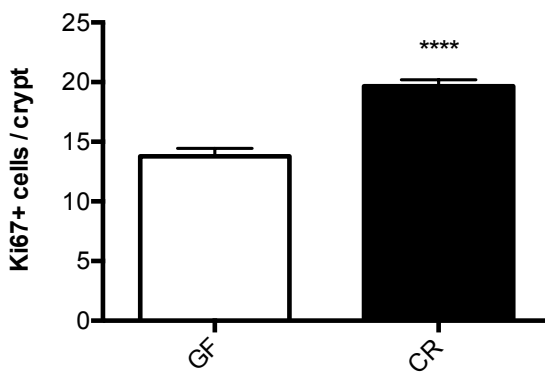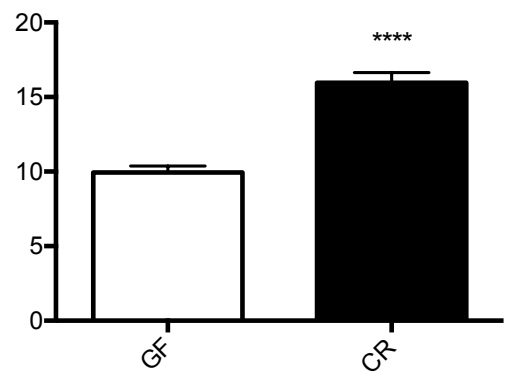

Fig. S1  
Sommer et al., 2015
